# Supplementary material for: Post-Analysis of Predictive Modeling with an Epidemiological Example
Source: MDPI journal article supplement (doi:10.3390/healthcare9070792), 2021-06-24

## Post-analysis of predictive modeling with an epidemiological example

Christina Brester<sup>a</sup>, Ari Voutilainen<sup>b</sup>, Tomi-Pekka Tuomainen<sup>b</sup>, Jussi Kauhanen<sup>b</sup>, Mikko Kolehmainen<sup>a</sup>

<sup>a</sup>Department of Environmental and Biological Sciences, University of Eastern Finland, Yliopistonranta 1 E, P.O. Box 1627, FI-70211 Kuopio, Finland;

<sup>b</sup>Institute of Public Health and Clinical Nutrition, University of Eastern Finland, Yliopistonranta 1 C, P.O. Box 1627, FI-70211 Kuopio, Finland

Corresponding author: Christina Brester, Yliopistonranta 1 E, P.O. Box 1627, FI-70211 Kuopio, Finland

+358449669095, kristina.brester@uef.fi, christina.brester@gmail.com

## Supplementary Material

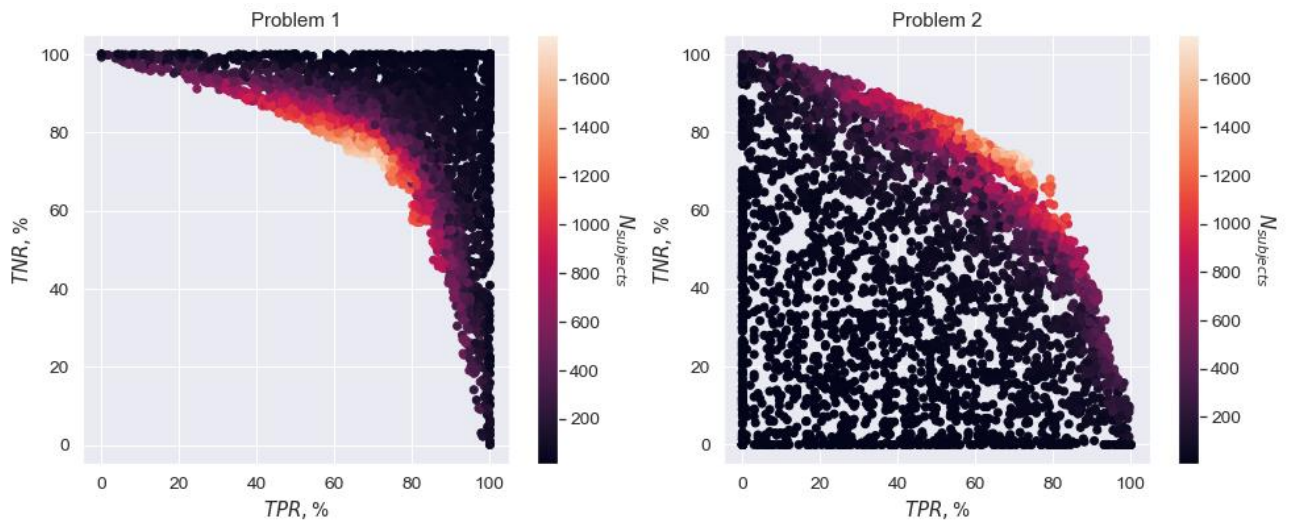

Figure S1: The initial sets of rules generated when solving Problems 1 and 2. Each point corresponds to one rule in the criterion space TPR-TNR, wherein a color indicates the number of subjects covered by the rule.

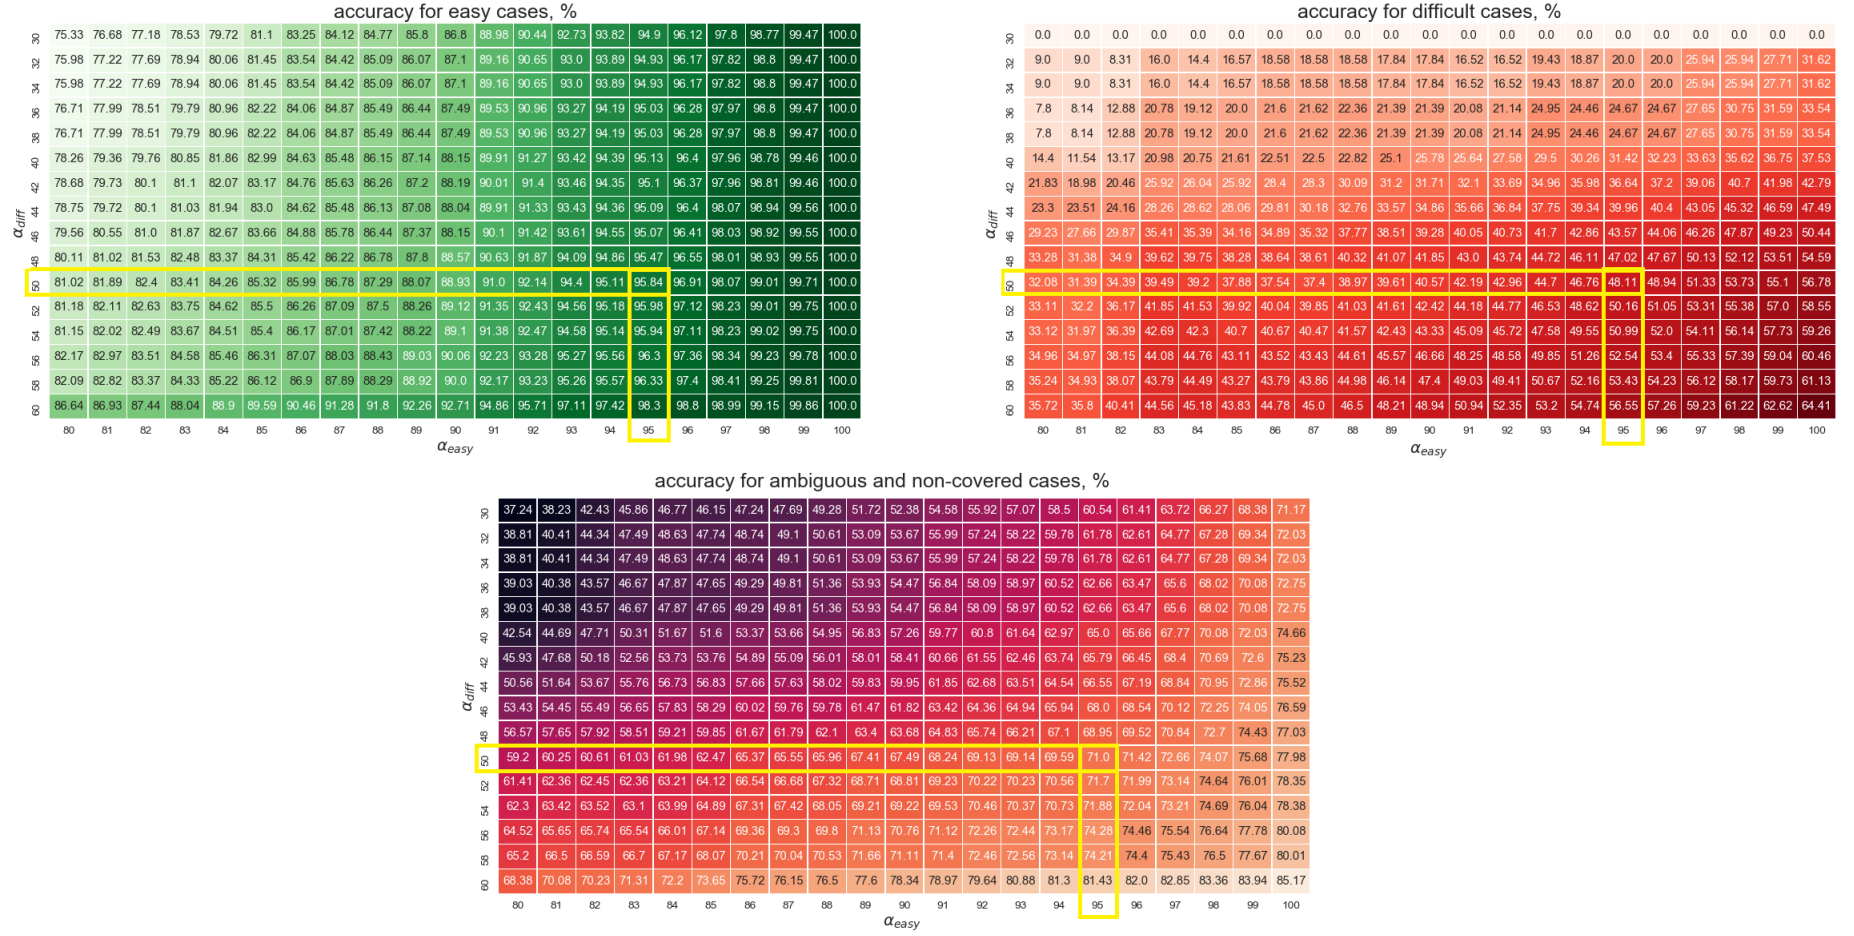

Figure S2: The overall accuracy for “easy”, “difficult”, “ambiguous” and “non-covered” subjects averaged over 50 runs of 5-fold cross-validation for different values of the thresholds  $\alpha_{easy}$  and  $\alpha_{diff}$ .

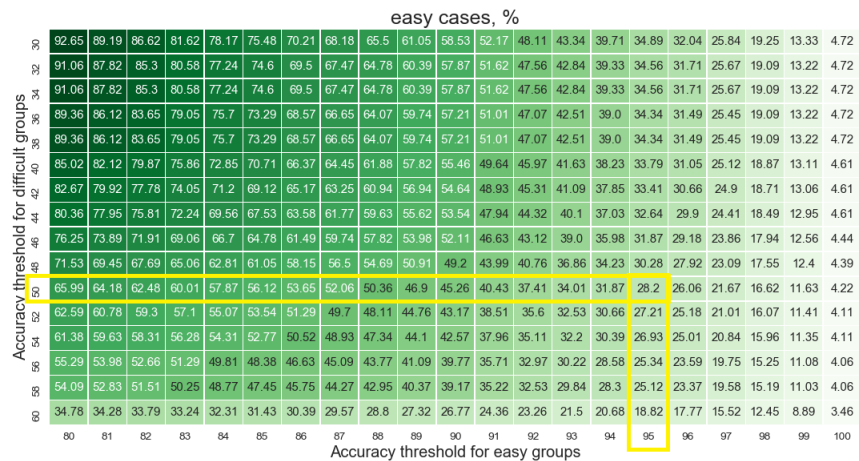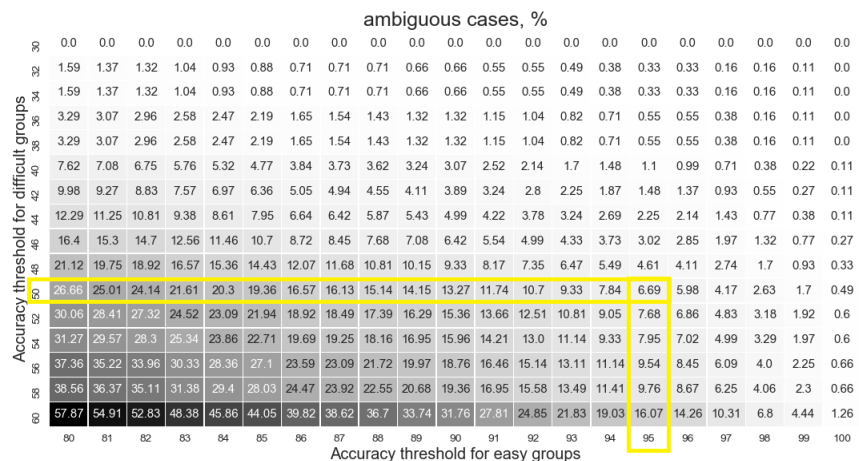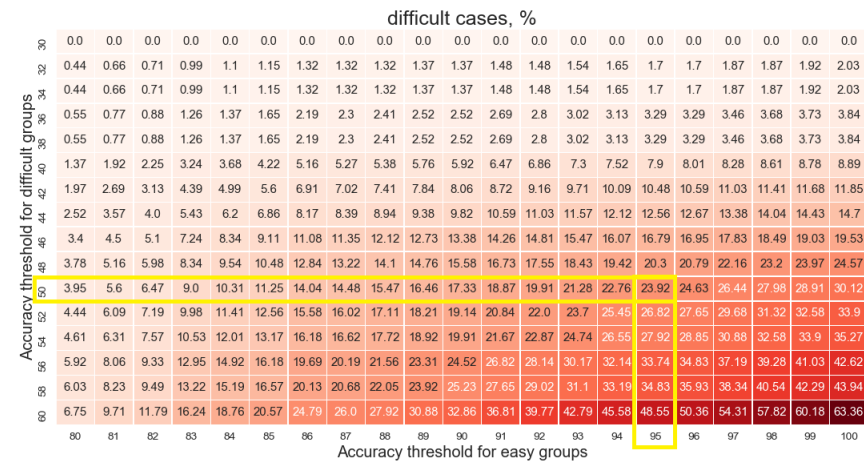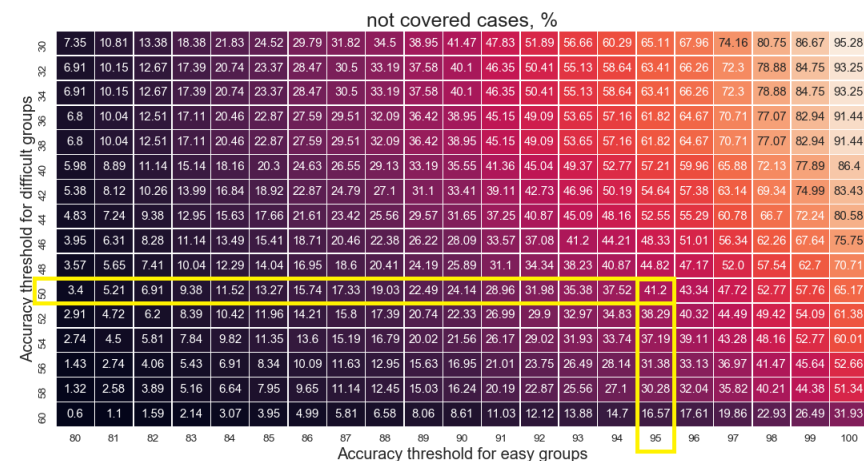

Supplement: s1 [file s1]
